# Supplementary material for: Caffeine administration prevents retinal neuroinflammation and loss of retinal ganglion cells in an animal model of glaucoma
Source: PubMed Central journal article supplement (PMC4897621; doi:10.1038/srep27532), 2016-06-08
Supplement: srep27532-s1.pdf [file srep27532-s1.pdf]

## SUPPLEMENTARY INFORMATION

### **Manuscript: Caffeine administration prevents retinal neuroinflammation and loss of retinal ganglion cells in an animal model of glaucoma**

Maria H. Madeira, Arturo-Ortin-Martinez, Francisco Nadal-Nícolas, António F. Ambrósio, Manuel Vidal-Sanz, Marta Agudo-Barriuso, Ana Raquel Santiago

#### Supplementary figure 1

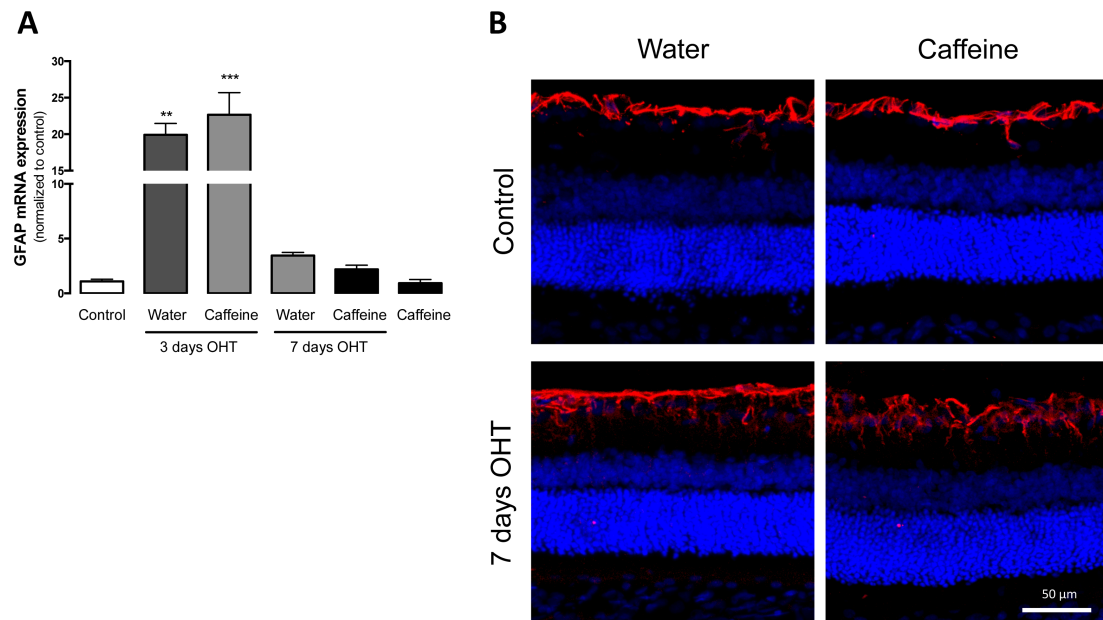

#### **Supplementary figure 1 – Caffeine did not alter the effect of OHT in the expression of GFAP.**

Retinal sections were immunostained for GFAP (marker of astroglial and Muller reactivity; red) and then imaged in a confocal microscope. Nuclei were stained with DAPI (blue). Representative images obtained from 3 independent experiments (**A**). Effects of caffeine administration on the mRNA expression of GFAP. Results are presented as fold change comparing with the control, from 5-7 independent experiments (**B**). \*\* $P < 0.01$  and \*\*\* $P < 0.001$ , significantly different from control; Kruskal-Wallis test, followed by Dunn's multiple comparison test.
